# Supplementary material for: Mitochondrial DNA from El Mirador Cave (Atapuerca, Spain) Reveals the Heterogeneity of Chalcolithic Populations
Source: PLoS One. 2014 Aug 12;9(8):e105105. doi: 10.1371/journal.pone.0105105 (PMC4130614; doi:10.1371/journal.pone.0105105)
Supplement: Figure S1 — mtDNA clone sequences of the El Mirador samples. Samples with potentially conflicting haplotypes or with substitutions that could be attributed to postmortem damage were repeatedly amplified to generate a consensus sequence. Some CRS clones attributable to background contamination have been suppressed for clarity. (PDF) [file pone.0105105.s001.pdf]

[illegible][illegible][illegible][illegible]

[illegible]

.....T.T.....C

[illegible]

Mirador10 224 256 311 K\*

[illegible][illegible]

Mirador12 224 311 K\*

[illegible]

Class 2 PCR1  
Class 3 PCR1  
Class 4 PCR1  
Class 5 PCR1  
Class 6 PCR1  
Class 7 PCR1  
Class 8 PCR1  
Class 9 PCR1  
Class 10 PCR1  
Class 11 PCR1  
Class 12 PCR1  
Class 13 PCR1  
Class 14 PCR1  
Class 15 PCR1  
Class 16 PCR1  
Class 1 PCR2  
Class 2 PCR2  
Class 3 PCR2  
Class 4 PCR2  
Class 5 PCR2  
Class 6 PCR2  
Class 7 PCR2  
Class 8 PCR2  
Class 9 PCR2  
Class 10 PCR2  
Class 11 PCR2  
Class 12 PCR2  
Class 13 PCR2  
Class 14 PCR2  
Class 15 PCR2  
Class 16 PCR2  
Miradon13 278 M\*  
Class 1 PCR1  
Class 2 PCR1  
Class 3 PCR1  
Class 4 PCR1  
Class 5 PCR1  
Class 6 PCR1  
Class 7 PCR1  
Class 8 PCR1  
Class 9 PCR1  
Class 10 PCR1  
Class 11 PCR1  
Class 12 PCR1  
Class 13 PCR1  
Class 14 PCR1  
Class 15 PCR1  
Class 16 PCR1  
Class 1 PCR2  
Class 2 PCR2  
Class 3 PCR2  
Class 4 PCR2  
Class 5 PCR2  
Class 6 PCR2  
Class 7 PCR2  
Class 8 PCR2  
Class 9 PCR2  
Class 10 PCR2  
Class 11 PCR2  
Class 12 PCR2  
Class 13 PCR2  
Class 14 PCR2  
Class 15 PCR2  
Class 16 PCR2  
Class 17 PCR2  
Miradon15 126 294 296 304 720\*  
Class 1 PCR1  
Class 2 PCR1  
Class 3 PCR1  
Class 4 PCR1  
Class 5 PCR1  
Class 6 PCR1  
Class 7 PCR1  
Class 8 PCR1  
Class 9 PCR1  
Class 10 PCR1  
Class 11 PCR1  
Class 12 PCR1  
Class 13 PCR1  
Class 14 PCR1  
Class 15 PCR1  
Class 16 PCR1  
Class 1 PCR2  
Class 2 PCR2  
Class 3 PCR2  
Class 4 PCR2  
Class 5 PCR2  
Class 6 PCR2  
Class 7 PCR2  
Class 8 PCR2  
Class 9 PCR2  
Class 10 PCR2  
Class 11 PCR2  
Class 12 PCR2  
Class 13 PCR2  
Class 14 PCR2  
Class 15 PCR2  
Class 16 PCR2  
Class 17 PCR2  
Miradon16 093 234 311 M\*  
Class 1 PCR1  
Class 2 PCR1  
Class 3 PCR1  
Class 4 PCR1



[illegible]

[illegible]
