# Supplementary material for: Mitochondrial DNA from El Mirador Cave (Atapuerca, Spain) Reveals the Heterogeneity of Chalcolithic Populations
Source: PLoS One. 2014 Aug 12;9(8):e105105. doi: 10.1371/journal.pone.0105105 (PMC4130614; doi:10.1371/journal.pone.0105105)
Supplement: Table S3 — Details and haplogroup frequencies of El Mirador, Central European metapopulation and prehistoric cultures used in Ward’s hierarchical clustering. Relative haplogroup frequencies of El Mirador and previously published populations [21] were used for hierarchical Ward clustering. Haplogroups were classified into 20 groups. (XLSX) [file pone.0105105.s006.xlsx]

## Sheet: Table S3
haplogroup frequencies
region	country	population	abbr.	n	U	U4	U5a	U5b	U8	N1a	T2	K	J	HV	V	W	X	I	U2	T1	R	H	U3	other
Europe, central	Czech Republic, Germany, Lithuania, Luxembourg, Poland	Hunter-gatherer central	HGC	16	18.75	12.5	12.5	50	6.25	0	0	0	0	0	0	0	0	0	0	0	0	0	0	0
Europe, central	Austria, Germany	Linear Pottery culture	LBK	102	0	0	1.96078	0.980392	0	12.7451	21.5686	19.6078	11.7647	4.90196	4.90196	2.94118	0.980392	0	0	0	0	16.6667	0.980392	0
Europe, central	Germany	Rössen culture	RSC	11	0	0	0	0	0	9.09091	18.1818	9.09091	0	9.09091	9.09091	0	9.09091	0	0	0	0	36.3636	0	0
Europe, central	Germany	Schöningen group	SCG	33	0	0	0	6.06061	3.0303	3.0303	12.1212	30.303	15.1515	3.0303	0	9.09091	3.0303	0	0	0	0	15.1515	0	0
Europe, central	Germany	Baalberge culture	BAC	19	0	0	0	5.26316	5.26316	5.26316	21.0526	10.5263	5.26316	5.26316	0	0	10.5263	0	0	5.26316	0	26.3158	0	0
Europe, central	Germany	Salzmünde culture	SMC	29	0	0	0	3.44828	0	6.89655	6.89655	10.3448	20.6897	3.44828	3.44828	0	3.44828	0	0	0	0	31.0345	10.3448	0
Europe, central	Germany	Bernburg culture	BEC	17	0	0	11.7647	17.6471	0	0	11.7647	17.6471	0	0	5.88235	5.88235	5.88235	0	0	0	0	23.5294	0	0
Europe, central	Germany	Corded Ware culture	CWC	44	0	6.81818	9.09091	4.54545	0	0	11.3636	13.6364	9.09091	2.27273	0	2.27273	6.81818	2.27273	2.27273	6.81818	0	22.7273	0	0
Europe, central	Germany	Bell Beaker culture	BBC	29	0	6.89655	13.7931	6.89655	0	0	6.89655	3.44828	3.44828	0	0	6.89655	0	0	0	3.44828	0	48.2759	0	0
Europe, central	Germany	Unetice culture	UC	94	2.12766	1.06383	12.766	2.12766	3.19149	0	6.38298	7.44681	6.38298	2.12766	3.19149	4.25532	5.31915	12.766	6.38298	2.12766	1.06383	21.2766	0	0
Europe, central	Austria, Germany, Czech Republic, Poland	Central European metapopulation	CEM	500	1.2	3.8	7	3.6	0.4	0.2	7.4	6	7.2	3	2.8	2	2.6	2.2	1.6	1.8	0.2	41.6	1.4	4
Europe	Spain	Mirador	MIR	19	0	0	0	0	0	0	21.0526	21.0526	10.5263	0	0	0	15.7895	0	0	0	0	26.3158	5.26316	0
